# Supplementary material
Source: PubMed Central journal article supplement (PMC3135702)
Supplement: NIHMS279075-supplement-supplement_1.pdf [file NIHMS279075-supplement-supplement_1.pdf]

Appendix A

Online Supplemental Materials: Figures

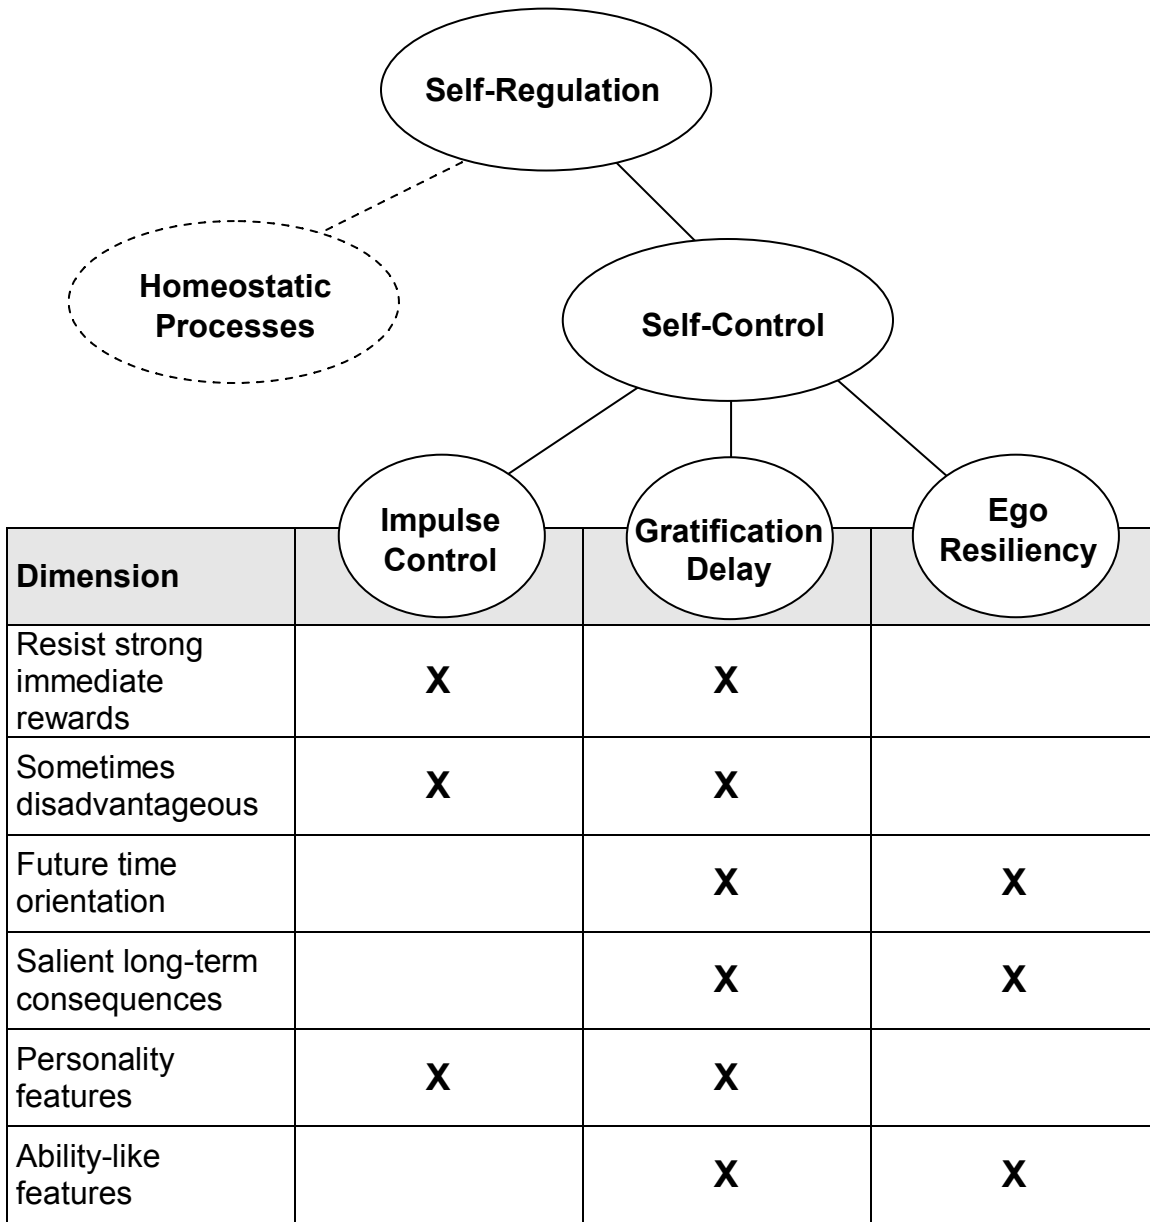

Figure A1. Hierarchy of self-regulation and related constructs.

Appendix A (continued)

Online Supplemental Materials: Figures

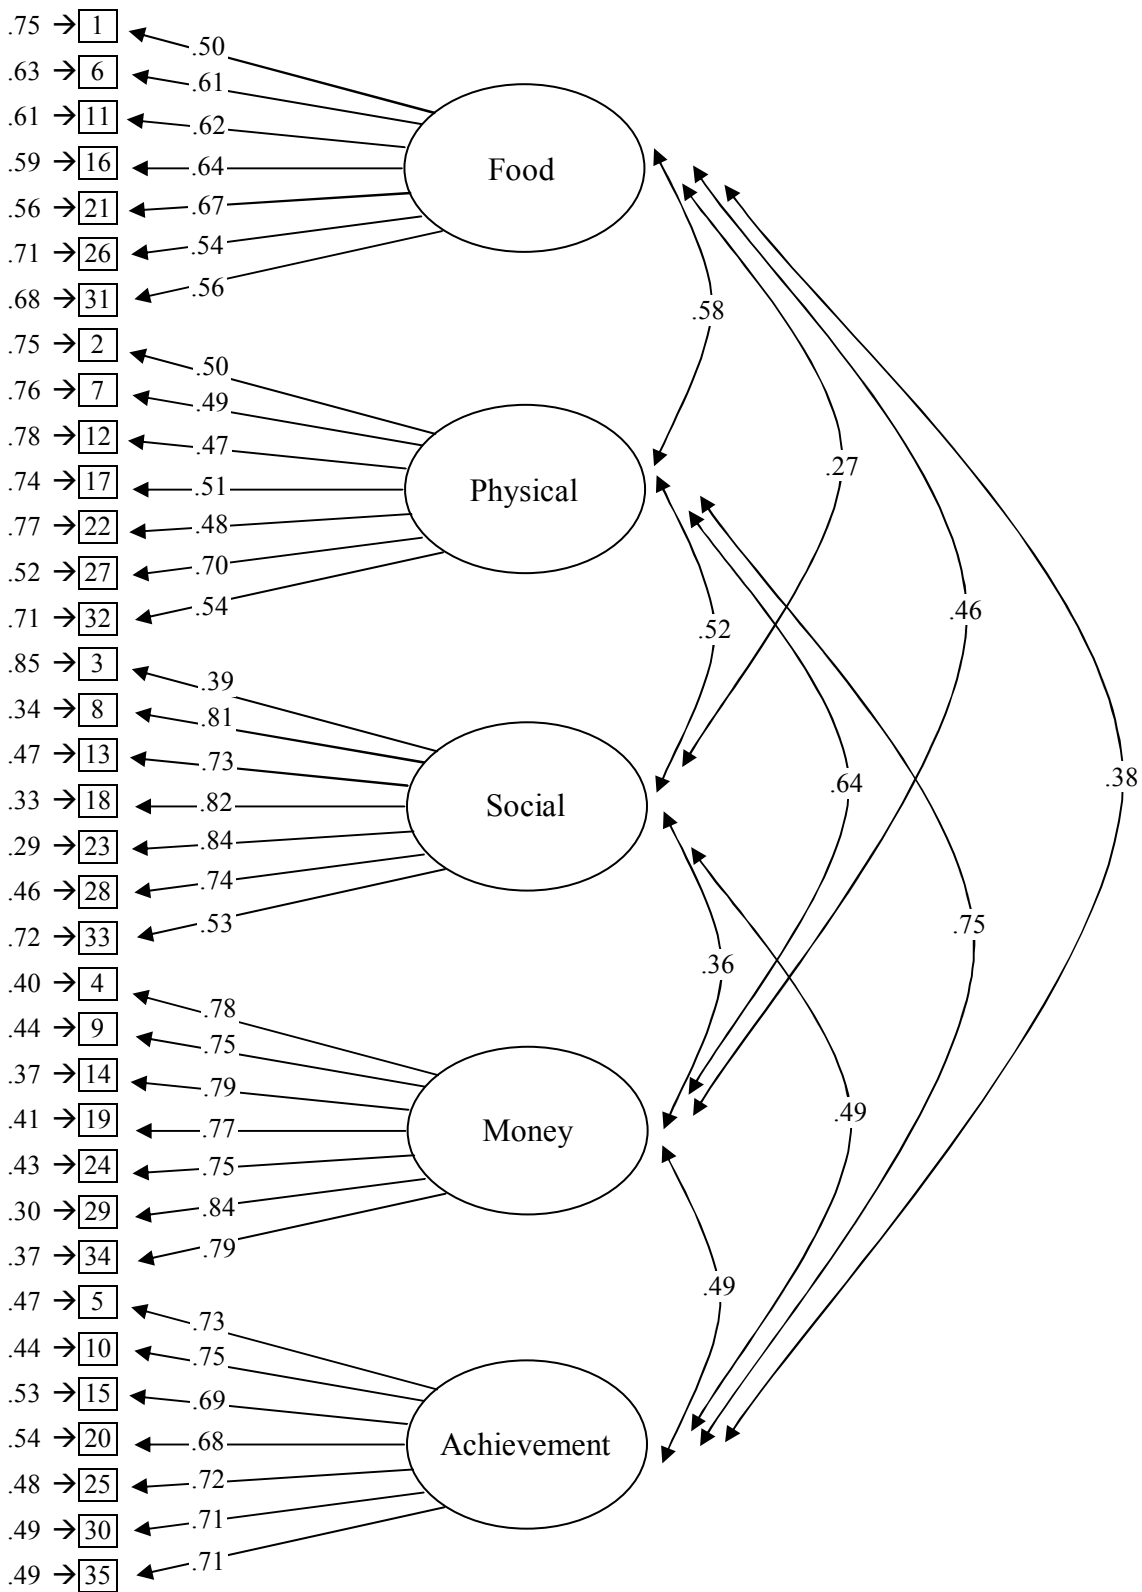

Figure A2. Confirmatory factor analysis for entire worldwide sample.

## Appendix B

## Online Supplemental Materials: Tables

Table B1

*Summary of Research Articles Describing Overlap of Five Factors*

| Year | Author(s)               | Food | Physical | Social | Money | Achievement |
|------|-------------------------|------|----------|--------|-------|-------------|
| 2008 | Lee et al.              |      |          | X      |       | X           |
| 2007 | Baumeister et al.       | X    | X        | X      | X     | X           |
| 2007 | Ramanathan & Williams   | X    | X        |        | X     |             |
| 2006 | Nederkoorn et al.       | X    | X        |        |       |             |
| 2006 | Ramanathan & Menon      | X    | X        |        | X     |             |
| 2004 | Bembenutty & Karabenick | X    |          | X      |       | X           |
| 2003 | Marcus                  |      | X        | X      |       |             |
| 1998 | Bembenutty & Karabenick |      | X        | X      |       | X           |
| 1994 | Baumeister et al.       | X    | X        |        | X     |             |
| 1988 | Mischel et al.          | X    |          | X      |       | X           |
| 1978 | Poggie                  |      |          |        | X     | X           |
| 1966 | Phillips                |      | X        | X      | X     | X           |
| 1955 | Singer                  | X    | X        | X      |       |             |

*Note.* Food = delay involving food, Phys = physical delay, Social = delay for social rewards, Money = monetary delay, Ach = delay for achievement

## Appendix B (continued)

## Online Supplemental Materials: Tables

Table B2

*Item Properties in Study 1*

| Item        | <i>M</i> | <i>SD</i> | Food       | Phys       | Soc        | Money      | Ach        | Total      |
|-------------|----------|-----------|------------|------------|------------|------------|------------|------------|
| Food        |          |           |            |            |            |            |            |            |
| 16          | 3.27     | 1.32      | <b>.59</b> | .23        | .09        | .21        | .12        | .34        |
| 21          | 3.64     | 1.26      | <b>.53</b> | .26        | .12        | .24        | .17        | <b>.37</b> |
| 6           | 2.89     | 1.31      | <b>.49</b> | .31        | .16        | .29        | .27        | <b>.43</b> |
| 11          | 2.69     | 1.29      | <b>.48</b> | .31        | .18        | .28        | .20        | <b>.40</b> |
| 31          | 3.27     | 1.26      | <b>.47</b> | .25        | .16        | .21        | .14        | .34        |
| 1           | 3.84     | 1.34      | <b>.42</b> | .28        | .17        | .25        | .21        | <b>.38</b> |
| 26          | 3.11     | 1.17      | <b>.39</b> | .26        | .17        | .27        | .29        | <b>.40</b> |
| Physical    |          |           |            |            |            |            |            |            |
| 27          | 2.98     | 1.32      | .30        | <b>.49</b> | .25        | <b>.39</b> | <b>.48</b> | <b>.54</b> |
| 22          | 3.55     | 1.31      | .15        | <b>.47</b> | .26        | .22        | .28        | <b>.38</b> |
| 12          | 3.99     | 1.21      | .17        | <b>.45</b> | .22        | .25        | .28        | <b>.38</b> |
| 2           | 3.41     | 1.13      | .32        | <b>.38</b> | .18        | .23        | .28        | <b>.40</b> |
| 7           | 3.13     | 1.21      | .32        | <b>.37</b> | .19        | .27        | .33        | <b>.42</b> |
| 32          | 2.57     | 1.19      | .25        | <b>.36</b> | .18        | .24        | <b>.37</b> | <b>.40</b> |
| 17          | 3.39     | 1.19      | .25        | .29        | .25        | .21        | <b>.36</b> | <b>.42</b> |
| Social      |          |           |            |            |            |            |            |            |
| 23          | 4.09     | 1.07      | .20        | .32        | <b>.64</b> | .25        | .32        | <b>.45</b> |
| 8           | 4.16     | 0.97      | .18        | .28        | <b>.64</b> | .19        | .27        | <b>.40</b> |
| 18          | 3.99     | 1.01      | .18        | .31        | <b>.64</b> | .19        | .32        | <b>.43</b> |
| 28          | 4.07     | 0.86      | .14        | .25        | <b>.62</b> | .13        | .28        | <b>.36</b> |
| 13          | 4.44     | 0.85      | .11        | .22        | <b>.55</b> | .16        | .23        | .33        |
| 33          | 4.55     | 0.71      | .09        | .13        | <b>.43</b> | .06        | .18        | .23        |
| 3           | 3.48     | 1.16      | .17        | .24        | .32        | .16        | .18        | .29        |
| Money       |          |           |            |            |            |            |            |            |
| 29          | 3.36     | 1.19      | .28        | <b>.35</b> | .14        | <b>.71</b> | .32        | <b>.51</b> |
| 34          | 3.63     | 1.21      | .30        | .31        | .17        | <b>.71</b> | .23        | <b>.48</b> |
| 4           | 3.64     | 1.16      | .33        | .33        | .19        | <b>.70</b> | .26        | <b>.51</b> |
| 14          | 3.99     | 0.95      | .30        | .34        | .23        | <b>.66</b> | .32        | <b>.53</b> |
| 9           | 3.76     | 1.28      | .30        | .33        | .16        | <b>.61</b> | .21        | <b>.46</b> |
| 24          | 3.77     | 1.22      | .24        | .31        | .19        | <b>.61</b> | .31        | <b>.47</b> |
| 19          | 4.30     | 1.04      | .31        | <b>.36</b> | .24        | <b>.61</b> | .34        | <b>.53</b> |
| Achievement |          |           |            |            |            |            |            |            |
| 10          | 3.87     | 1.16      | .15        | <b>.37</b> | .25        | .23        | <b>.66</b> | <b>.46</b> |
| 5           | 3.61     | 1.24      | .17        | <b>.37</b> | .28        | .23        | <b>.63</b> | <b>.46</b> |
| 30          | 3.76     | 1.14      | .21        | <b>.42</b> | .26        | .26        | <b>.59</b> | <b>.49</b> |
| 25          | 3.32     | 1.37      | .29        | <b>.50</b> | .26        | .31        | <b>.59</b> | <b>.55</b> |
| 35          | 4.19     | 0.98      | .20        | <b>.41</b> | .26        | .23        | <b>.56</b> | <b>.47</b> |
| 15          | 3.13     | 1.37      | .23        | <b>.46</b> | .25        | .30        | <b>.56</b> | <b>.50</b> |
| 20          | 3.72     | 1.18      | .27        | <b>.45</b> | .30        | .28        | <b>.55</b> | <b>.52</b> |

Note.  $n = 1,900$ . Values for the Food, Physical, Social, Money, Achievement, and Total columns refer to item-total and corrected item-total correlations. To facilitate visual inspection, correlations greater than magnitude  $r = .35$  are in bold. Items are presented in order of descending corrected item-total correlations by subscale.

## Appendix B (continued)

## Online Supplemental Materials: Tables

Table B3

*Item Properties in Study 2*

| Item        | <i>M</i> | <i>SD</i> | Food       | Phys       | Soc        | Money      | Ach        | Total      |
|-------------|----------|-----------|------------|------------|------------|------------|------------|------------|
| Food        |          |           |            |            |            |            |            |            |
| 16          | 3.08     | 1.32      | <b>.50</b> | .20        | .09        | .17        | .14        | .30        |
| 21          | 3.93     | 1.13      | <b>.51</b> | .25        | .15        | .23        | .18        | <b>.36</b> |
| 6           | 2.79     | 1.30      | <b>.48</b> | .29        | .13        | .25        | .22        | <b>.38</b> |
| 11          | 2.61     | 1.25      | <b>.48</b> | .30        | .16        | .28        | .16        | <b>.38</b> |
| 31          | 3.36     | 1.26      | <b>.44</b> | .26        | .17        | .21        | .19        | <b>.35</b> |
| 1           | 3.47     | 1.41      | <b>.38</b> | .26        | .12        | .20        | .16        | .31        |
| 26          | 3.27     | 1.21      | <b>.42</b> | .33        | .21        | .31        | .34        | <b>.45</b> |
| Physical    |          |           |            |            |            |            |            |            |
| 27          | 3.02     | 1.31      | <b>.36</b> | <b>.49</b> | .29        | <b>.43</b> | <b>.47</b> | <b>.57</b> |
| 22          | 3.45     | 1.27      | .11        | <b>.46</b> | .25        | .26        | .25        | <b>.35</b> |
| 12          | 3.96     | 1.19      | .12        | <b>.42</b> | .28        | .24        | .26        | <b>.35</b> |
| 2           | 3.44     | 1.14      | .30        | <b>.38</b> | .21        | .27        | .29        | <b>.41</b> |
| 7           | 2.99     | 1.24      | <b>.36</b> | .31        | .20        | .26        | <b>.35</b> | <b>.42</b> |
| 32          | 2.34     | 1.21      | .23        | <b>.40</b> | .24        | .30        | .31        | <b>.41</b> |
| 17          | 3.18     | 1.25      | .29        | <b>.35</b> | .26        | .30        | .30        | <b>.45</b> |
| Social      |          |           |            |            |            |            |            |            |
| 23          | 4.28     | 0.92      | .17        | .34        | <b>.67</b> | .28        | .33        | <b>.46</b> |
| 8           | 4.16     | 0.93      | .15        | .29        | <b>.66</b> | .23        | .29        | <b>.41</b> |
| 18          | 3.98     | 0.99      | .20        | <b>.37</b> | <b>.66</b> | .28        | <b>.38</b> | <b>.49</b> |
| 28          | 4.17     | 0.82      | .16        | .30        | <b>.61</b> | .20        | .32        | <b>.41</b> |
| 13          | 4.54     | 0.80      | .12        | .26        | <b>.56</b> | .24        | .25        | <b>.37</b> |
| 33          | 4.56     | 0.68      | .10        | .15        | <b>.42</b> | .14        | .21        | .26        |
| 3           | 3.59     | 1.14      | .20        | .27        | .33        | .22        | .20        | .33        |
| Money       |          |           |            |            |            |            |            |            |
| 29          | 3.54     | 1.16      | .31        | <b>.44</b> | .25        | <b>.74</b> | <b>.41</b> | <b>.60</b> |
| 34          | 3.60     | 1.22      | .31        | <b>.40</b> | .23        | <b>.71</b> | .28        | <b>.54</b> |
| 4           | 3.68     | 1.26      | .29        | <b>.36</b> | .23        | <b>.70</b> | .26        | <b>.51</b> |
| 14          | 4.08     | 0.98      | .28        | <b>.40</b> | .32        | <b>.67</b> | <b>.38</b> | <b>.57</b> |
| 9           | 3.91     | 1.25      | .30        | <b>.37</b> | .24        | <b>.65</b> | .26        | <b>.51</b> |
| 24          | 3.96     | 1.19      | .26        | <b>.36</b> | .27        | <b>.65</b> | <b>.36</b> | <b>.53</b> |
| 19          | 4.35     | 1.01      | .27        | <b>.37</b> | .29        | <b>.62</b> | .34        | <b>.53</b> |
| Achievement |          |           |            |            |            |            |            |            |
| 10          | 3.90     | 1.17      | .15        | .34        | .27        | .28        | <b>.65</b> | <b>.46</b> |
| 5           | 3.53     | 1.27      | .15        | <b>.36</b> | .28        | .26        | <b>.64</b> | <b>.46</b> |
| 30          | 3.92     | 1.06      | .24        | <b>.39</b> | .31        | .33        | <b>.59</b> | <b>.52</b> |
| 25          | 3.39     | 1.38      | .34        | <b>.50</b> | .31        | .36        | <b>.59</b> | <b>.58</b> |
| 35          | 4.27     | 0.92      | .24        | <b>.37</b> | .32        | .25        | <b>.58</b> | <b>.48</b> |
| 15          | 3.27     | 1.34      | .23        | <b>.45</b> | .29        | .31        | <b>.59</b> | <b>.52</b> |
| 20          | 3.77     | 1.17      | .24        | <b>.39</b> | .31        | .30        | <b>.57</b> | <b>.50</b> |

Note.  $n = 7,771$ . Values for the Food, Physical, Social, Money, Achievement, and Total columns refer to item-total and corrected item-total correlations. To facilitate visual inspection, correlations greater than magnitude  $r = .35$  are in bold. Items are presented in same order as previous table for ease of comparison.

## Appendix B (continued)

## Online Supplemental Materials: Tables

Table B4

*Scale Properties in Studies 1 and 2*

| Study 1     |          |           |       |       |       |       |       |       |       |
|-------------|----------|-----------|-------|-------|-------|-------|-------|-------|-------|
| Scale       | <i>M</i> | <i>SD</i> | F     | P     | S     | M     | A     | 10    | 35    |
| Food        | 22.7     | 5.8       | (.77) |       |       |       |       |       |       |
| Physical    | 23.0     | 5.1       | .42   | (.69) |       |       |       |       |       |
| Social      | 28.8     | 4.5       | .23   | .37   | (.80) |       |       |       |       |
| Money       | 26.5     | 6.1       | .39   | .44   | .25   | (.88) |       |       |       |
| Achievement | 25.6     | 6.0       | .31   | .60   | .37   | .37   | (.84) |       |       |
| DGI-10      | 35.8     | 6.6       | .58   | .71   | .57   | .62   | .75   | (.77) |       |
| DGI-35      | 126.6    | 19.5      | .68   | .79   | .59   | .71   | .76   | .91   | (.90) |
| Study 2     |          |           |       |       |       |       |       |       |       |
| Scale       | <i>M</i> | <i>SD</i> | F     | P     | S     | M     | A     | 10    | 35    |
| Food        | 22.5     | 5.6       | (.74) |       |       |       |       |       |       |
| Physical    | 22.4     | 5.1       | .43   | (.69) |       |       |       |       |       |
| Social      | 29.4     | 4.3       | .23   | .42   | (.81) |       |       |       |       |
| Money       | 27.2     | 6.2       | .37   | .50   | .33   | (.89) |       |       |       |
| Achievement | 26.1     | 6.0       | .32   | .56   | .41   | .42   | (.84) |       |       |
| DGI-10      | 36.3     | 6.7       | .59   | .72   | .58   | .66   | .73   | (.79) |       |
| DGI-35      | 127.5    | 19.6      | .66   | .80   | .62   | .75   | .76   | .92   | (.91) |

*Note.*  $n_1 = 1,900$ .  $n_2 = 7,771$ . F = Food, P = Physical, S = Social, M = Money, A = Achievement, 10 = DGI-10 short form composite, 35 = DGI-35 composite. Table values are means, standard deviations, and correlations, with alphas indicated in parentheses.

## Appendix B (continued)

## Online Supplemental Materials: Tables

Table B5

*Scale Properties in Study 1 by Gender*

| Females     |          |           |       |       |       |       |       |       |       |
|-------------|----------|-----------|-------|-------|-------|-------|-------|-------|-------|
| Scale       | <i>M</i> | <i>SD</i> | F     | P     | S     | M     | A     | 10    | 35    |
| Food        | 21.9     | 5.8       | (.76) |       |       |       |       |       |       |
| Physical    | 23.9     | 4.9       | .46   | (.68) |       |       |       |       |       |
| Social      | 29.6     | 4.1       | .20   | .35   | (.76) |       |       |       |       |
| Money       | 26.1     | 6.1       | .38   | .47   | .24   | (.87) |       |       |       |
| Achievement | 26.9     | 5.7       | .32   | .60   | .37   | .38   | (.84) |       |       |
| DGI-10      | 36.4     | 6.3       | .61   | .71   | .55   | .61   | .74   | (.75) |       |
| DGI-35      | 128.3    | 18.7      | .69   | .81   | .55   | .73   | .76   | .91   | (.90) |
| Males       |          |           |       |       |       |       |       |       |       |
| Scale       | <i>M</i> | <i>SD</i> | F     | P     | S     | M     | A     | 10    | 35    |
| Food        | 23.5     | 5.7       | (.76) |       |       |       |       |       |       |
| Physical    | 22.3     | 5.1       | .45   | (.69) |       |       |       |       |       |
| Social      | 28.1     | 4.9       | .30   | .36   | (.82) |       |       |       |       |
| Money       | 26.8     | 6.1       | .38   | .44   | .28   | (.88) |       |       |       |
| Achievement | 24.4     | 6.1       | .37   | .58   | .35   | .40   | (.83) |       |       |
| DGI-10      | 35.3     | 6.9       | .59   | .70   | .57   | .63   | .76   | (.78) |       |
| DGI-35      | 125.0    | 20.0      | .70   | .78   | .61   | .72   | .76   | .91   | (.90) |

*Note.*  $n_{\text{female}} = 888$ .  $n_{\text{male}} = 997$ . F = Food, P = Physical, S = Social, M = Money, A = Achievement, 10 = DGI-10 short form composite, 35 = DGI-35 composite. Table values are means, standard deviations, and correlations, with alphas indicated in parentheses. All mean differences by gender are statistically significant ( $p < .05$ ).

## Appendix B (continued)

## Online Supplemental Materials: Tables

Table B6

*Scale Properties in Study 2 by Gender*

| Females     |          |           |       |       |       |       |       |       |       |
|-------------|----------|-----------|-------|-------|-------|-------|-------|-------|-------|
| Scale       | <i>M</i> | <i>SD</i> | F     | P     | S     | M     | A     | 10    | 35    |
| Food        | 21.9     | 5.6       | (.75) |       |       |       |       |       |       |
| Physical    | 23.4     | 4.9       | .46   | (.67) |       |       |       |       |       |
| Social      | 30.1     | 4.0       | .24   | .39   | (.79) |       |       |       |       |
| Money       | 27.0     | 6.2       | .36   | .51   | .31   | (.88) |       |       |       |
| Achievement | 27.4     | 5.5       | .32   | .55   | .39   | .41   | (.83) |       |       |
| DGI-10      | 37.1     | 6.4       | .61   | .73   | .56   | .66   | .71   | (.77) |       |
| DGI-35      | 129.7    | 18.9      | .68   | .80   | .60   | .75   | .74   | .91   | (.90) |
| Males       |          |           |       |       |       |       |       |       |       |
| Scale       | <i>M</i> | <i>SD</i> | F     | P     | S     | M     | A     | 10    | 35    |
| Food        | 23.1     | 5.5       | (.74) |       |       |       |       |       |       |
| Physical    | 21.5     | 5.1       | .45   | (.70) |       |       |       |       |       |
| Social      | 28.8     | 4.4       | .27   | .41   | (.81) |       |       |       |       |
| Money       | 27.3     | 6.3       | .38   | .51   | .34   | (.89) |       |       |       |
| Achievement | 25.0     | 6.1       | .37   | .55   | .39   | .45   | (.84) |       |       |
| DGI-10      | 35.7     | 6.9       | .61   | .71   | .58   | .67   | .75   | (.80) |       |
| DGI-35      | 125.6    | 20.1      | .68   | .79   | .62   | .76   | .77   | .92   | (.91) |

*Note.*  $n_{\text{female}} = 3,578$ .  $n_{\text{male}} = 4,142$ . F = Food, P = Physical, S = Social, M = Money, A = Achievement, 10 = DGI-10 short form composite, 35 = DGI-35 composite. Table values are means, standard deviations, and correlations, with alphas indicated in parentheses. All mean differences by gender are statistically significant ( $p < .05$ ).



## Appendix B (continued)

## Online Supplemental Materials: Tables

Table B7

*Scale Properties in Study 1 by Location*

| U.S. Participants          |          |           |       |       |       |       |       |       |       |
|----------------------------|----------|-----------|-------|-------|-------|-------|-------|-------|-------|
| Scale                      | <i>M</i> | <i>SD</i> | F     | P     | S     | M     | A     | 10    | 35    |
| Food                       | 22.6     | 5.8       | (.77) |       |       |       |       |       |       |
| Physical                   | 23.4     | 5.1       | .42   | (.70) |       |       |       |       |       |
| Social                     | 29.1     | 4.5       | .21   | .31   | (.80) |       |       |       |       |
| Money                      | 26.4     | 6.3       | .39   | .40   | .23   | (.88) |       |       |       |
| Achievement                | 26.3     | 6.0       | .32   | .57   | .31   | .34   | (.84) |       |       |
| DGI-10                     | 36.1     | 6.7       | .58   | .69   | .55   | .59   | .74   | (.77) |       |
| DGI-35                     | 127.7    | 19.9      | .69   | .77   | .56   | .70   | .74   | .91   | (.91) |
| International Participants |          |           |       |       |       |       |       |       |       |
| Scale                      | <i>M</i> | <i>SD</i> | F     | P     | S     | M     | A     | 10    | 35    |
| Food                       | 23.0     | 5.7       | (.77) |       |       |       |       |       |       |
| Physical                   | 22.4     | 5.0       | .43   | (.68) |       |       |       |       |       |
| Social                     | 28.4     | 4.6       | .25   | .41   | (.81) |       |       |       |       |
| Money                      | 26.5     | 5.9       | .38   | .47   | .26   | (.86) |       |       |       |
| Achievement                | 24.4     | 5.9       | .32   | .61   | .40   | .40   | (.82) |       |       |
| DGI-10                     | 35.3     | 6.5       | .59   | .72   | .57   | .63   | .76   | (.77) |       |
| DGI-35                     | 124.7    | 18.8      | .68   | .81   | .60   | .72   | .77   | .91   | (.89) |

*Note.*  $n_{US} = 1,178$ .  $n_{International} = 695$ . F = Food, P = Physical, S = Social, M = Money, A = Achievement, 10 = DGI-10 short form composite, 35 = DGI-35 composite. Table values are means, standard deviations, and correlations, with alphas indicated in parentheses. All mean differences by nationality are statistically significant, except for the Food and Money subscales ( $p < .05$ ).

## Appendix B (continued)

## Online Supplemental Materials: Tables

Table B8

*Scale Properties in Study 2 by Location*

| U.S. Participants          |          |           |       |       |       |       |       |       |       |
|----------------------------|----------|-----------|-------|-------|-------|-------|-------|-------|-------|
| Scale                      | <i>M</i> | <i>SD</i> | F     | P     | S     | M     | A     | 10    | 35    |
| Food                       | 22.2     | 5.7       | (.75) |       |       |       |       |       |       |
| Physical                   | 22.6     | 5.3       | .43   | (.71) |       |       |       |       |       |
| Social                     | 29.4     | 4.4       | .25   | .44   | (.81) |       |       |       |       |
| Money                      | 26.9     | 6.4       | .36   | .51   | .35   | (.89) |       |       |       |
| Achievement                | 26.8     | 6.0       | .33   | .57   | .44   | .45   | (.85) |       |       |
| DGI-10                     | 36.4     | 6.9       | .59   | .74   | .61   | .67   | .75   | (.80) |       |
| DGI-35                     | 128.0    | 20.3      | .66   | .81   | .64   | .76   | .77   | .92   | (.91) |
| International Participants |          |           |       |       |       |       |       |       |       |
| Scale                      | <i>M</i> | <i>SD</i> | F     | P     | S     | M     | A     | 10    | 35    |
| Food                       | 22.8     | 5.4       | (.73) |       |       |       |       |       |       |
| Physical                   | 22.2     | 4.9       | .42   | (.68) |       |       |       |       |       |
| Social                     | 29.3     | 4.1       | .22   | .39   | (.80) |       |       |       |       |
| Money                      | 27.4     | 6.1       | .38   | .49   | .30   | (.89) |       |       |       |
| Achievement                | 25.3     | 5.9       | .32   | .56   | .38   | .40   | (.83) |       |       |
| DGI-10                     | 36.3     | 6.6       | .59   | .71   | .56   | .65   | .73   | (.79) |       |
| DGI-35                     | 127.0    | 19.0      | .67   | .79   | .60   | .75   | .76   | .91   | (.90) |

*Note.*  $n_{US} = 3,747$ .  $n_{International} = 3,903$ . F = Food, P = Physical, S = Social, M = Money, A = Achievement, 10 = DGI-10 short form composite, 35 = DGI-35 composite. Table values are means, standard deviations, and correlations, with alphas indicated in parentheses. All mean differences by nationality are statistically significant, except for the Social subscale and DGI-10 scale ( $p < .05$ ).

## Appendix B (continued)

## Online Supplemental Materials: Tables

Table B9

*Model Fit and Measurement Invariance Across Study Samples, Gender, and Location*

| Constraint                 | CFI  | NFI  | RMSEA | sRMR | AIC    | $\chi^2_{S-B}$ | $\chi^2_{S-B}/df$ |
|----------------------------|------|------|-------|------|--------|----------------|-------------------|
| All Participants           |      |      |       |      |        |                |                   |
| 5-Factor                   | .964 | .962 | .057  | .058 | 18,031 | 17,871         | 32.49             |
| 4-Factor                   | .958 | .957 | .061  | .065 | 20,797 | 20,645         | 37.27             |
| Invariance Across Studies  |      |      |       |      |        |                |                   |
| Structure                  | .962 | .960 | .058  | .059 | 19,374 | 19,054         | 17.32             |
| Loadings                   | .961 | .959 | .058  | .061 | 19,903 | 19,643         | 17.38             |
| Var-Cov                    | .961 | .959 | .058  | .062 | 20,020 | 19,790         | 17.28             |
| Invariance Across Gender   |      |      |       |      |        |                |                   |
| Structure                  | .965 | .962 | .056  | .059 | 18,033 | 17,713         | 16.10             |
| Loadings                   | .964 | .961 | .056  | .061 | 18,487 | 18,227         | 16.13             |
| Var-Cov                    | .963 | .961 | .056  | .069 | 18,716 | 18,486         | 16.14             |
| Invariance Across Location |      |      |       |      |        |                |                   |
| Structure                  | .963 | .961 | .058  | .059 | 24,592 | 24,272         | 22.07             |
| Loadings                   | .961 | .960 | .058  | .062 | 25,222 | 24,962         | 22.09             |
| Var-Cov                    | .961 | .959 | .057  | .064 | 25,356 | 25,126         | 21.94             |

*Note.*  $n = 9,671$ . CFI = Comparative Fit Index, NFI = Normed Fit Index, RMSEA = Root Mean Square Error of Approximation, sRMR = standardized Root Mean Residual, AIC = Akaike Information Criterion, S-B = Satorra-Bentler correction, 5-Factor = base model with five factors, 4-Factor = model with four factors, Structure = constrained to have the same factor structure across subsamples, Loadings = constrained to have the same loadings across subsamples, Var-Cov = constrained to have the same variance-covariance matrix across subsamples.

## Appendix B (continued)

## Online Supplemental Materials: Tables

Table B10

*Replication of Correlations between DGI Scores, Trait Descriptor Ratings, and Behavioral Tendency Ratings in Study 3*

| Measure                  | F           | P           | S           | M           | A           | 10          | 35          |
|--------------------------|-------------|-------------|-------------|-------------|-------------|-------------|-------------|
| Trait Descriptors        |             |             |             |             |             |             |             |
| Moderation               | <b>.54</b>  | .24         | .06         | <b>.29</b>  | <b>.35</b>  | <b>.46</b>  | <b>.44</b>  |
| Self-Discipline          | <b>.53</b>  | <b>.41</b>  | .20         | <b>.26</b>  | <b>.59</b>  | <b>.68</b>  | <b>.58</b>  |
| Diligence                | <b>.51</b>  | <b>.44</b>  | .21         | <b>.37</b>  | <b>.65</b>  | <b>.60</b>  | <b>.64</b>  |
| Conscientiousness        | <b>.47</b>  | <b>.36</b>  | .03         | .15         | <b>.56</b>  | <b>.43</b>  | <b>.45</b>  |
| Self-Control             | .22         | .24         | <b>.27</b>  | <b>.33</b>  | .20         | <b>.37</b>  | <b>.37</b>  |
| Extravagance             | -.08        | -.19        | <b>-.29</b> | <b>-.63</b> | <b>-.31</b> | <b>-.31</b> | <b>-.46</b> |
| Immoderation             | <b>-.59</b> | -.07        | -.05        | <b>-.32</b> | <b>-.35</b> | <b>-.40</b> | <b>-.42</b> |
| Achievement-Striving     | .29         | <b>.42</b>  | .23         | <b>.43</b>  | <b>.68</b>  | <b>.59</b>  | <b>.60</b>  |
| Well-Being               | <b>.34</b>  | .20         | .21         | .16         | <b>.46</b>  | <b>.41</b>  | <b>.40</b>  |
| Prudence                 | .15         | <b>.48</b>  | <b>.36</b>  | <b>.32</b>  | <b>.29</b>  | <b>.47</b>  | <b>.46</b>  |
| Patience                 | <b>.27</b>  | <b>.36</b>  | <b>.43</b>  | <b>.30</b>  | .20         | <b>.39</b>  | <b>.45</b>  |
| Perceived Health         | <b>.26</b>  | .07         | .09         | .11         | <b>.34</b>  | .24         | <b>.26</b>  |
| Impulse Control          | <b>.43</b>  | .24         | <b>.25</b>  | .14         | <b>.35</b>  | <b>.39</b>  | <b>.41</b>  |
| Rebelliousness           | -.20        | <b>-.45</b> | <b>-.49</b> | <b>-.34</b> | <b>-.37</b> | <b>-.56</b> | <b>-.54</b> |
| Agreeableness            | .17         | <b>.34</b>  | <b>.49</b>  | .05         | <b>.27</b>  | <b>.46</b>  | <b>.37</b>  |
| Neuroticism              | -.21        | -.21        | -.18        | .12         | <b>-.27</b> | <b>-.27</b> | -.20        |
| Depression               | <b>-.34</b> | -.19        | .01         | -.02        | <b>-.30</b> | <b>-.26</b> | -.24        |
| Anger                    | -.15        | -.09        | -.29        | -.03        | -.09        | <b>-.25</b> | -.18        |
| Sensation-Seeking        | <b>-.26</b> | <b>-.55</b> | -.19        | <b>-.40</b> | <b>-.30</b> | <b>-.47</b> | <b>-.49</b> |
| Altruism                 | .10         | .24         | <b>.62</b>  | .04         | .19         | <b>.35</b>  | <b>.33</b>  |
| Anxiety                  | -.15        | .02         | .01         | .02         | -.05        | -.10        | -.04        |
| Perceived Attractiveness | <b>.35</b>  | .04         | .00         | .11         | .20         | .23         | .21         |
| Somatization             | -.01        | .19         | -.02        | -.07        | -.06        | .01         | .00         |
| Comprehension            | <b>.22</b>  | <b>.34</b>  | .18         | <b>.26</b>  | <b>.27</b>  | <b>.31</b>  | <b>.37</b>  |
| Excitement-Seeking       | .19         | <b>-.31</b> | <b>-.31</b> | -.21        | -.04        | -.22        | -.19        |
| Perceived Intelligence   | .21         | .18         | .09         | .18         | .11         | .23         | .23         |
| Risk-Taking              | .08         | <b>-.28</b> | <b>-.31</b> | -.11        | -.08        | -.24        | -.19        |
| Openness to Experience   | .02         | .07         | <b>.28</b>  | .05         | .10         | .07         | .15         |
| Machiavellianism         | .14         | .03         | -.18        | -.06        | .04         | -.04        | -.01        |
| Extraversion             | .05         | -.12        | .10         | -.09        | .23         | .04         | .05         |
| Behavioral Tendency      |             |             |             |             |             |             |             |
| Buy unneeded purchases   | <b>-.31</b> | <b>-.32</b> | -.15        | <b>-.54</b> | <b>-.29</b> | <b>-.38</b> | <b>-.49</b> |
| Lie or hide the truth    | -.12        | <b>-.26</b> | <b>-.30</b> | <b>-.25</b> | <b>-.37</b> | <b>-.30</b> | <b>-.38</b> |
| Pay bills on time        | .10         | .17         | .17         | <b>.37</b>  | <b>.37</b>  | <b>.32</b>  | <b>.35</b>  |
| Bend or break the rules  | -.19        | <b>-.49</b> | <b>-.48</b> | <b>-.43</b> | <b>-.33</b> | <b>-.55</b> | <b>-.56</b> |
| Eat fast food            | -.04        | <b>-.37</b> | -.22        | .01         | -.12        | <b>-.28</b> | -.20        |
| Exercise                 | <b>.33</b>  | .09         | -.14        | -.16        | <b>.33</b>  | <b>.30</b>  | .12         |
| Help other people        | -.05        | <b>.30</b>  | <b>.55</b>  | .01         | <b>.26</b>  | <b>.34</b>  | <b>.30</b>  |
| Party excessively        | -.21        | <b>-.47</b> | -.24        | -.29        | <b>-.25</b> | <b>-.37</b> | <b>-.42</b> |

|                             |             |             |             |             |             |             |             |
|-----------------------------|-------------|-------------|-------------|-------------|-------------|-------------|-------------|
| Drink pop / soda            | .17         | -.03        | <b>-.33</b> | .02         | -.07        | -.14        | -.06        |
| Smoke cigarettes            | -.11        | <b>-.30</b> | <b>-.31</b> | <b>-.39</b> | <b>-.37</b> | <b>-.41</b> | <b>-.44</b> |
| Think about sex             | -.05        | <b>-.30</b> | <b>-.27</b> | -.20        | -.18        | <b>-.29</b> | <b>-.29</b> |
| Read books                  | .04         | <b>.48</b>  | .15         | .09         | .23         | <b>.27</b>  | <b>.27</b>  |
| Check financial news        | <b>.33</b>  | .16         | -.17        | .04         | .19         | .09         | .16         |
| Think about food            | <b>-.39</b> | .03         | .09         | -.11        | .09         | -.05        | -.09        |
| Gamble                      | -.02        | -.23        | <b>-.33</b> | -.21        | -.11        | -.27        | <b>-.26</b> |
| Discuss intellectual topics | .15         | .08         | -.09        | .16         | .16         | .14         | .14         |
| Watch television shows      | -.07        | -.06        | -.16        | .05         | -.09        | -.14        | -.09        |

*Note.*  $n = 64$ . F = Food, P = Physical, S = Social, M = Money, A = Achievement, 10 = DGI-10 short form composite, 35 = DGI-35 composite. For consistency with manuscript Table 3, items are presented in the same order rather than descending. To facilitate visual inspection, statistically significant correlations are bold ( $p < .05$ ).
